# Supplementary material for: Integration of Droplet Microfluidic Tools for Single-cell Functional Metagenomics: An Engineering Head Start
Source: PubMed Central journal article supplement — Genomics Proteomics Bioinformatics. 2021 Dec 21;19(3):504–18. doi: 10.1016/j.gpb.2021.03.010 (PMC8864243; doi:10.1016/j.gpb.2021.03.010), 2021-12-21
Supplement: mmc4.pdf [file mmc4.pdf]

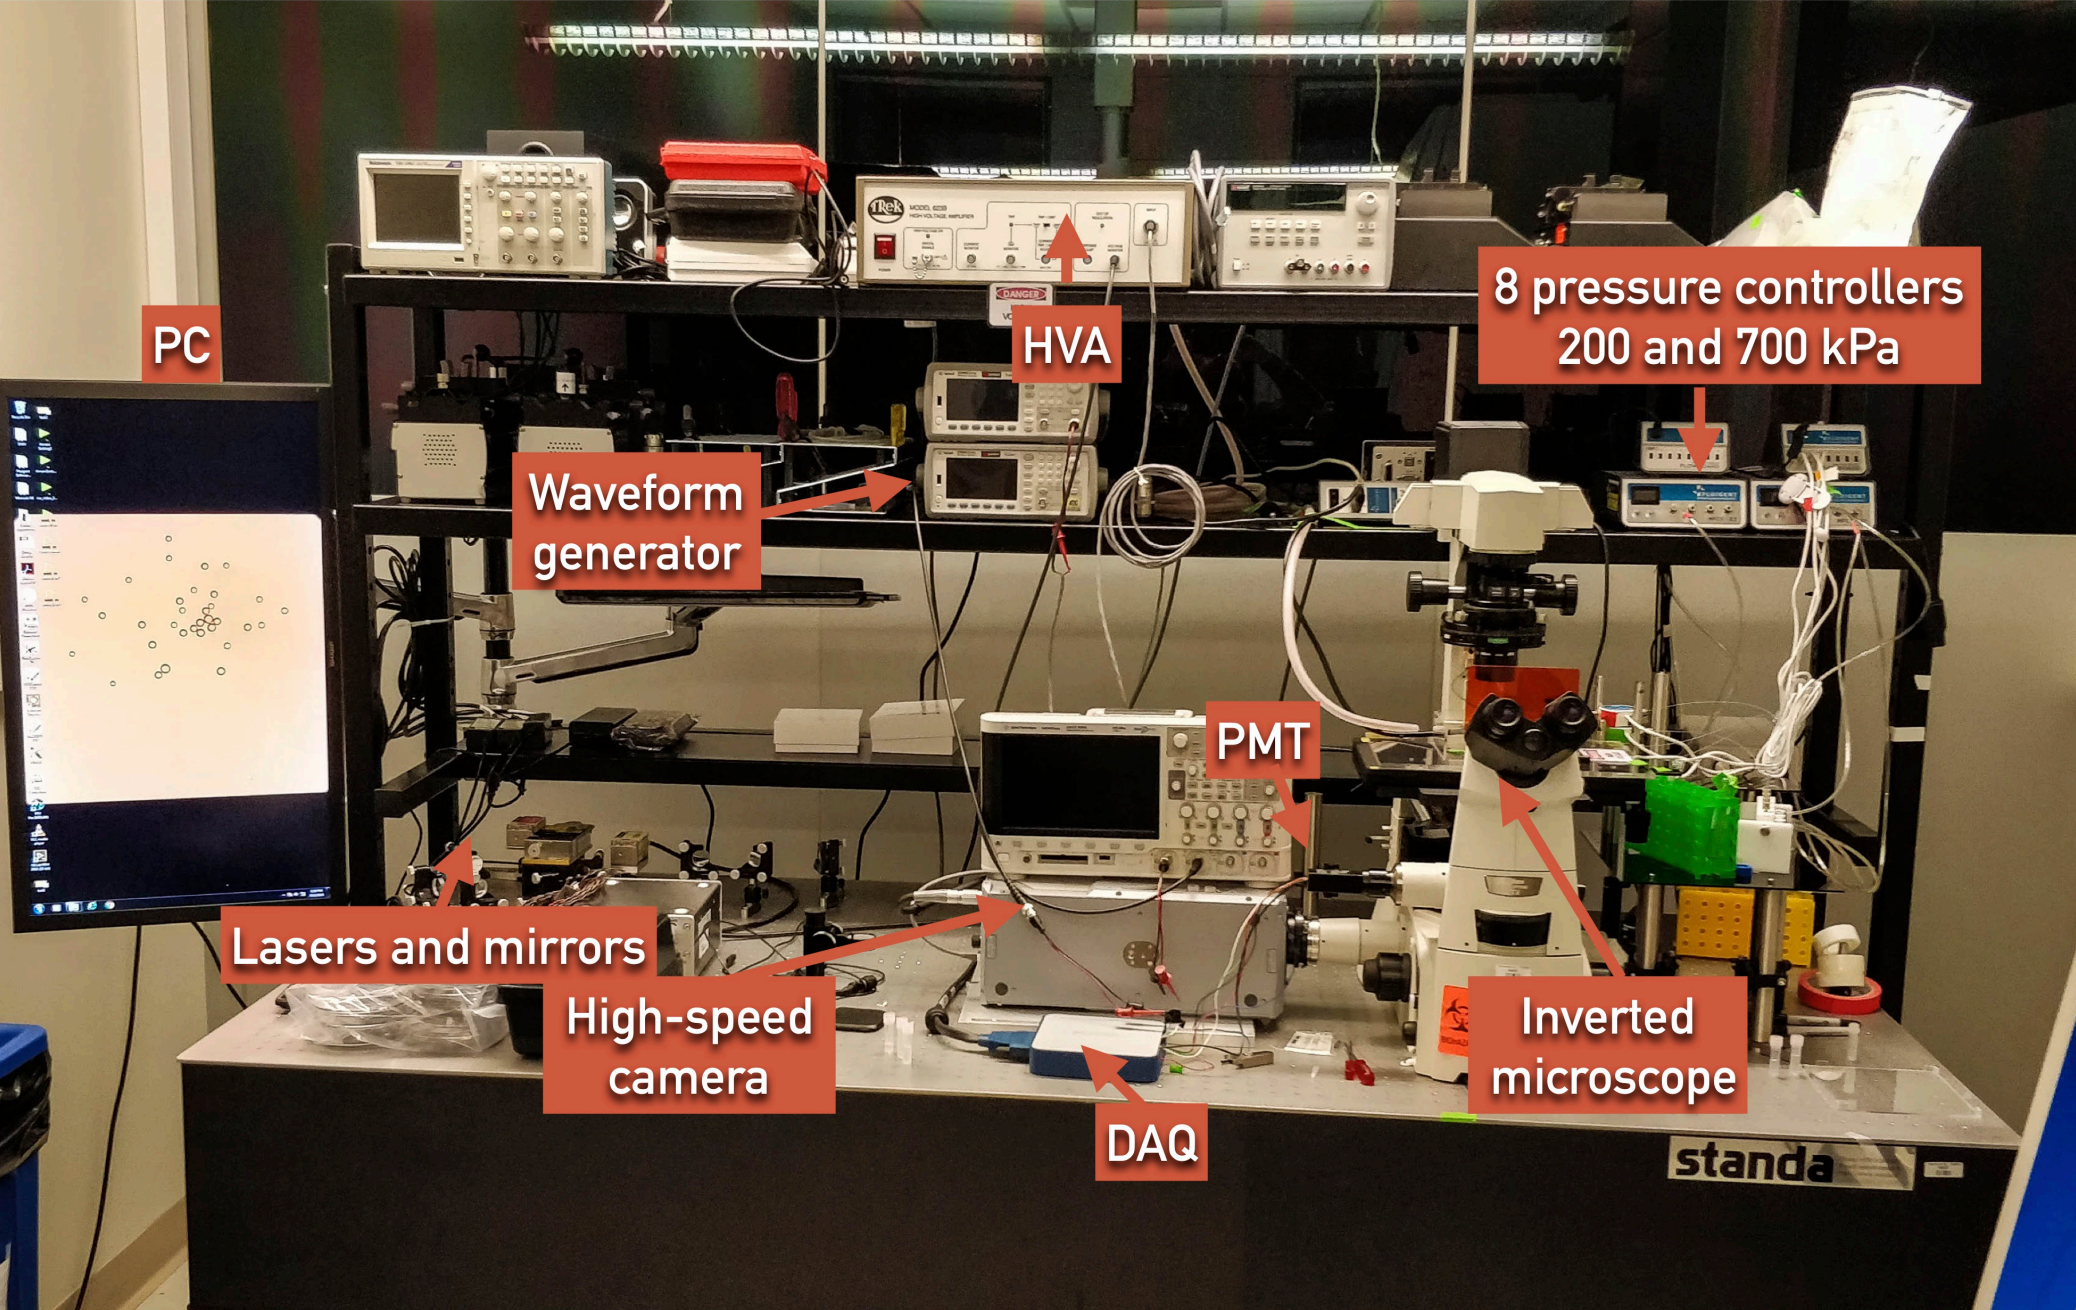

PC

HVA

8 pressure controllers  
200 and 700 kPa

Waveform  
generator

PMT

Lasers and mirrors

High-speed  
camera

DAQ

Inverted  
microscope

standa
