# Supplementary material for: Integration of Droplet Microfluidic Tools for Single-cell Functional Metagenomics: An Engineering Head Start
Source: PubMed Central journal article supplement — Genomics Proteomics Bioinformatics. 2021 Dec 21;19(3):504–18. doi: 10.1016/j.gpb.2021.03.010 (PMC8864243; doi:10.1016/j.gpb.2021.03.010), 2021-12-21

Reading the PMT signal

Debouncing

Initialization

Positive droplet counter

Triggering signal

Response time

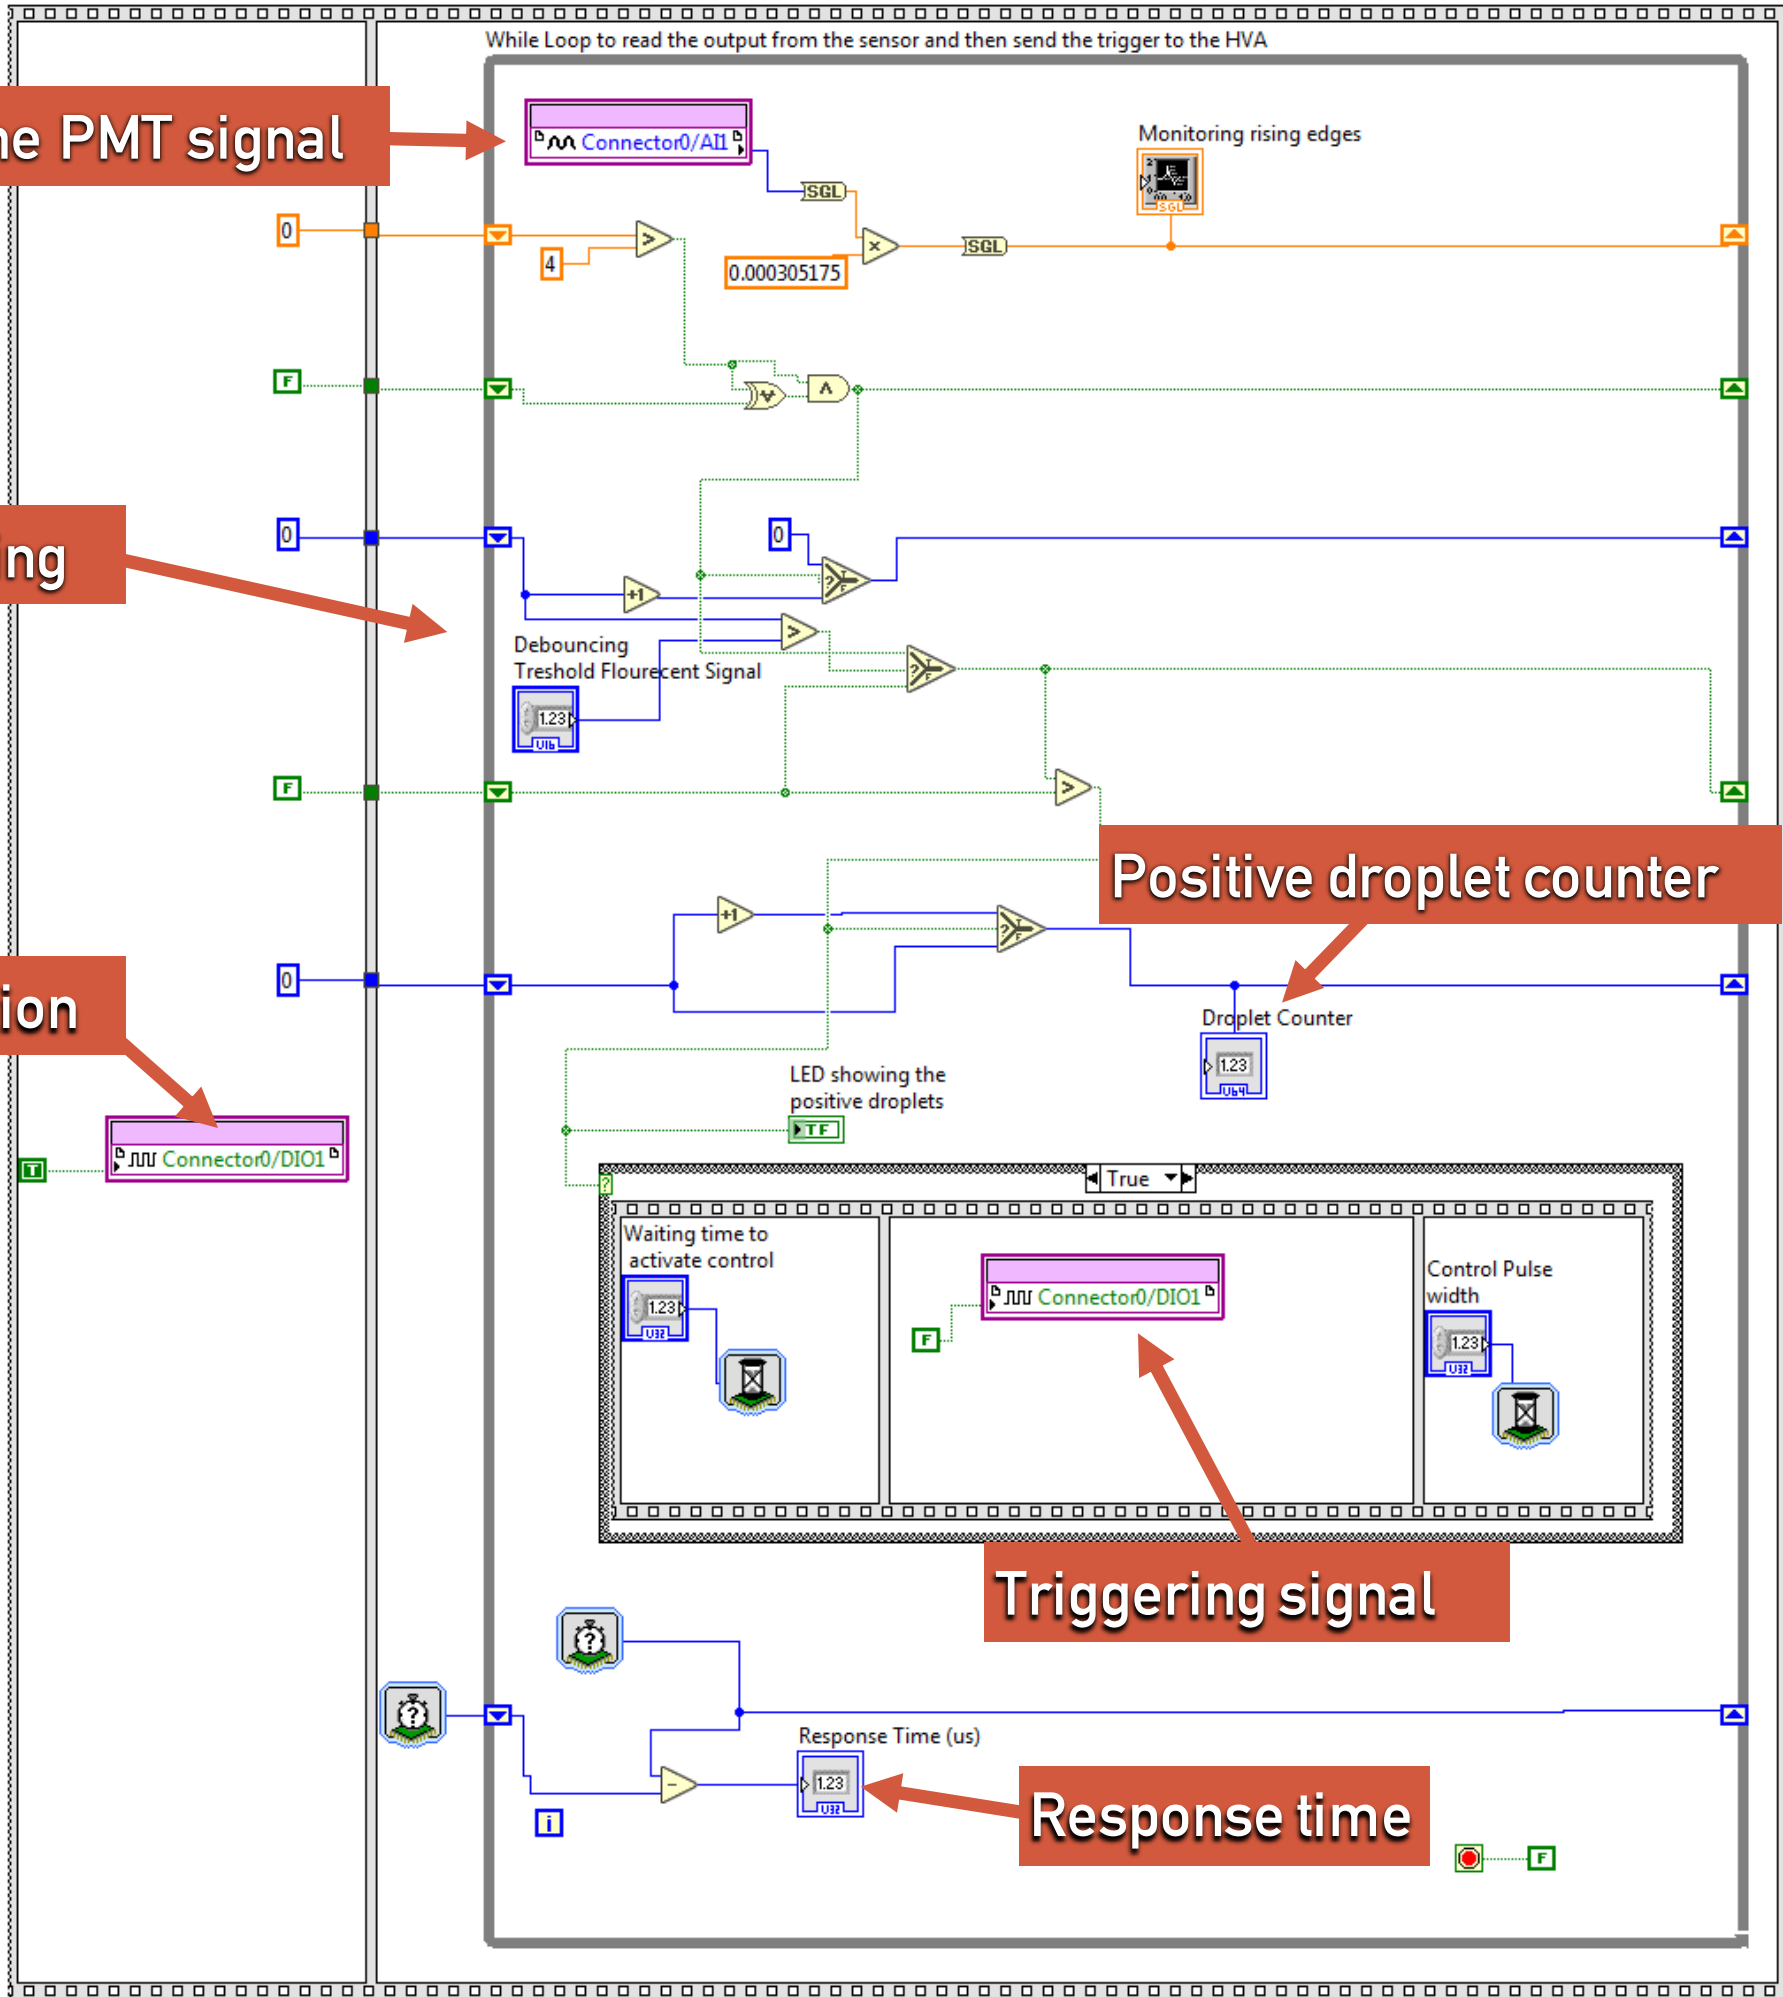

Supplement: mmc6.pdf [file mmc6.pdf]
