# Supplementary material for: Integration of Droplet Microfluidic Tools for Single-cell Functional Metagenomics: An Engineering Head Start
Source: PubMed Central journal article supplement — Genomics Proteomics Bioinformatics. 2021 Dec 21;19(3):504–18. doi: 10.1016/j.gpb.2021.03.010 (PMC8864243; doi:10.1016/j.gpb.2021.03.010), 2021-12-21

While Loop to that displays as fast as possible the both the generated generator and the response signal

Reading Both the Generated Signal and the PMT signals

Reading a simulated signal

0.000305175

Generated signal V\_cont

Displaying the simulated signal

Debouncing

Debouncing Treshold Control Signal

LED showing the control pulses

Pulse counter

Pulse Counter

Response Time (us) 2

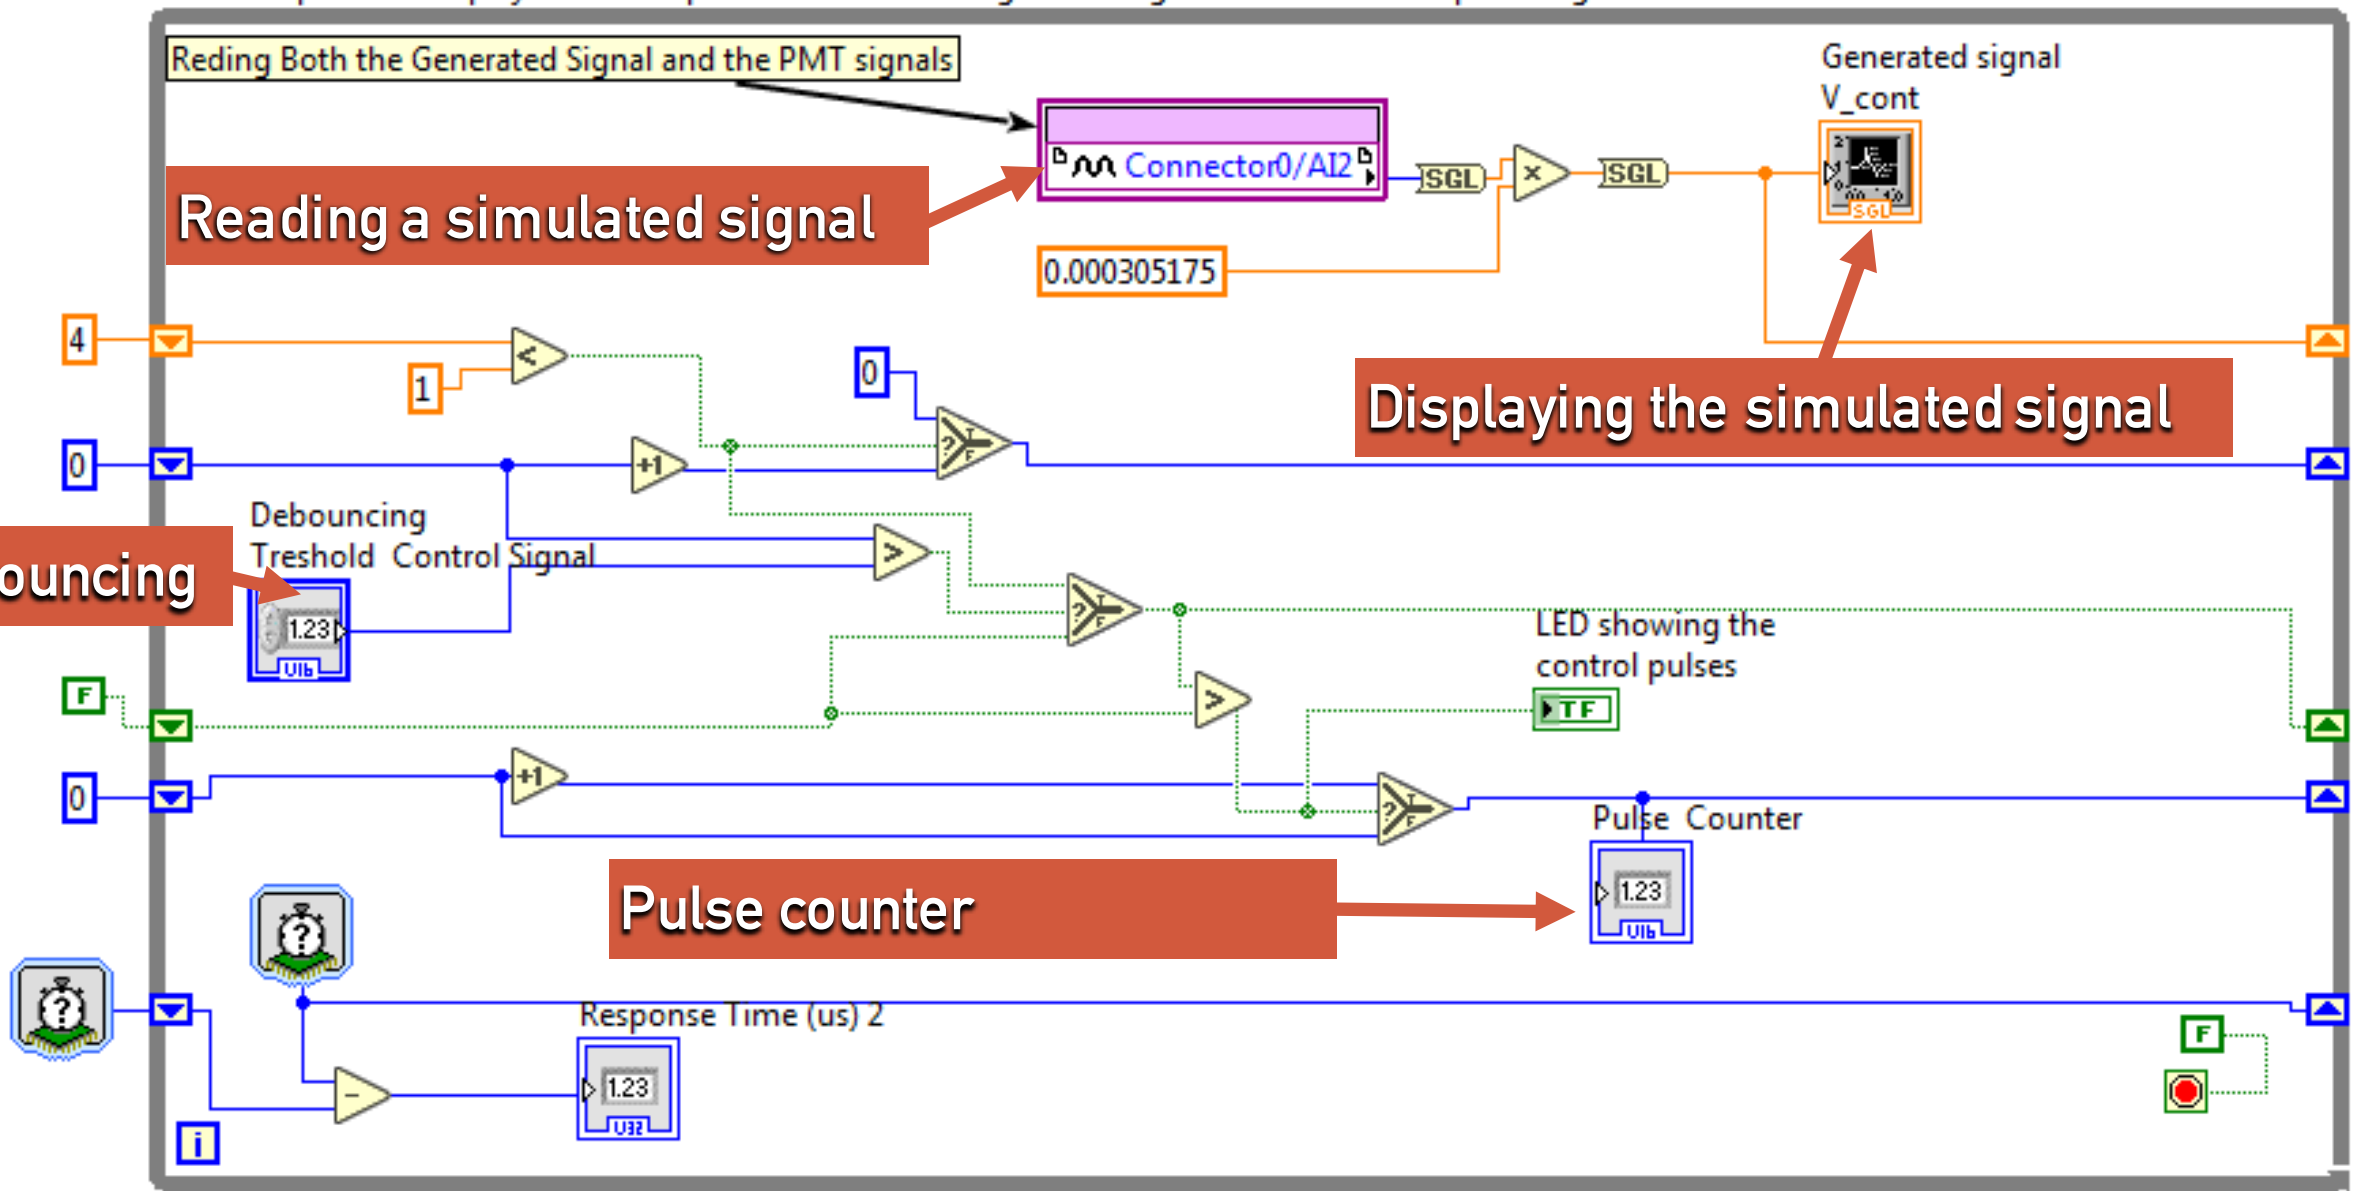

Supplement: mmc7.pdf [file mmc7.pdf]
