# Supplementary material for: Integration of Droplet Microfluidic Tools for Single-cell Functional Metagenomics: An Engineering Head Start
Source: PubMed Central journal article supplement — Genomics Proteomics Bioinformatics. 2021 Dec 21;19(3):504–18. doi: 10.1016/j.gpb.2021.03.010 (PMC8864243; doi:10.1016/j.gpb.2021.03.010), 2021-12-21
Supplement: mmc8.pdf [file mmc8.pdf]

# Simulated PMT reading

This section reads the generated control signal that triggers the high voltage output

Debouncing Treshold Control Signal: 500

Pulse Counter: 7

Response Time (us) 2: 66

LED showing the control pulses:

# Deboucing threshold

This section reads the flourecense signal at the PMTs and outputs the high voltage output

Debouncing Treshold Flourecent Signal: 500

Waiting Time Before Signal is triggered (uSec): 500001

Time of the Pulse (uSec): 100000

Counter of positive droplets

Droplet Counter: 7

Response Time (us): 66

LED showing the positive droplets:

# PMT signal, rising edges

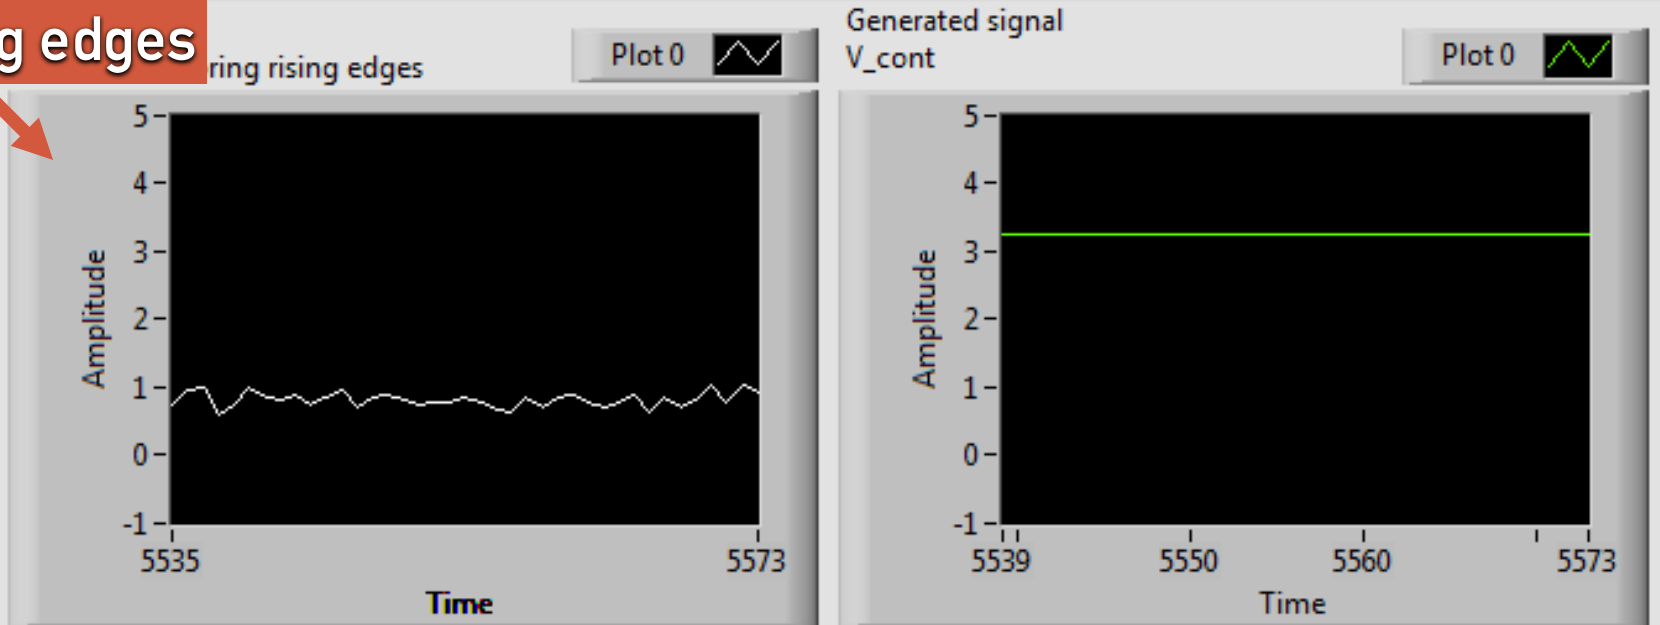

# Slider controlling sensitivity of PMT

V-control PMT's Sensitivity (0.5 to 1.1V)

V-control Indicator: 0.702041

Negative 5V equi. to -16385

Positive 5V equivalent to 16384

PMT voltage supply
